# Supplementary material for: Reviewing the Prospective Pharmacological Potential of Isothiocyanates in Fight against Female-Specific Cancers
Source: MDPI journal article supplement (doi:10.3390/cancers15082390), 2023-04-20
Supplement: s1 [file s1]

## Supplementary Information

**Table S1.** Summary of Some of the Clinical Trials of Isothiocyanates (Information extracted from clinicaltrials.gov).

|                               |                                                                                     |                                                                                                                    |                                                                                                                                                                                                |                                                                                                                                                                                                                                                                                                                                                                                                                                                                                                                                |                                                     |
|-------------------------------|-------------------------------------------------------------------------------------|--------------------------------------------------------------------------------------------------------------------|------------------------------------------------------------------------------------------------------------------------------------------------------------------------------------------------|--------------------------------------------------------------------------------------------------------------------------------------------------------------------------------------------------------------------------------------------------------------------------------------------------------------------------------------------------------------------------------------------------------------------------------------------------------------------------------------------------------------------------------|-----------------------------------------------------|
| Title of the clinical studies | Behavioural Dietary Intervention for the Improvement of Bladder Cancer Survivorship | Study of the Effects of PEITC on Oral Cells with Mutant p53                                                        | Chemoprevention of Prostate Cancer, Histone Deacetylase (HDAC) Inhibition and DNA Methylation                                                                                                  | PEITC in Preventing Lung Cancer in Smokers                                                                                                                                                                                                                                                                                                                                                                                                                                                                                     | PEITC in Preventing Lung Cancer in People Who Smoke |
| Status                        | Recruiting                                                                          | Completed                                                                                                          | Completed                                                                                                                                                                                      | Completed                                                                                                                                                                                                                                                                                                                                                                                                                                                                                                                      | Completed                                           |
| Conditions                    | Stage 0a Bladder Cancer AJCC v8                                                     | Oral Cancer                                                                                                        | Prostate Cancer                                                                                                                                                                                | Lung Cancer; Tobacco Use Disorder                                                                                                                                                                                                                                                                                                                                                                                                                                                                                              | Lung Cancer                                         |
| Interventions/Treatment       | Dietary Intervention                                                                | Dietary Supplement (Watercress Juice)                                                                              | SFN-rich broccoli sprout extract (BSE) capsules                                                                                                                                                | PEITC                                                                                                                                                                                                                                                                                                                                                                                                                                                                                                                          | PEITC                                               |
| Outcome Measures              | Changes in urinary ITCs levels                                                      | Evidence of reduced number of oral cells with mutant p53 following administration of PEITC derived from watercress | Changes in total urine SFN metabolites levels; changes of total Plasma SFN metabolites levels; changes in percentage of Ki67 Positive Cells post-randomization; changes in expression of HDAC6 | Urinary levels of biomarkers of 4-(methylnitrosamino)-1-(3-pyridyl)-1-butanone (NNK) metabolism; effects of GSTM1 Genotype on PEITC-NNK association and on the metabolism and excretion of PEITC; effects of GSTT1 Genotype on PEITC-NNK association and on the metabolism and excretion of PEITC; combined effects of GSTM1 and GSTT1 Genotype on PEITC-NNK association and on the metabolism and excretion of PEITC; urinary Levels of [Pyridine-D4] Hydroxy Acid:Total [Pyridine-D4] NNAL ratio by GSTM1 and GSTT1 Genotype | No data                                             |
| Sponsors/Collaborators        | Roswell Park Cancer Institute                                                       | Georgetown University                                                                                              | Portland VA Medical Center; National Cancer Institute (NCI); Oregon State University; OHSU Knight Cancer Institute                                                                             | University of Minnesota; National Cancer Institute (NCI)                                                                                                                                                                                                                                                                                                                                                                                                                                                                       | NYU Langone Health                                  |
| Gender                        | All                                                                                 | All                                                                                                                | Male                                                                                                                                                                                           | All                                                                                                                                                                                                                                                                                                                                                                                                                                                                                                                            | All                                                 |
| Age                           | 18 Years and above                                                                  | 20 Years to 65 Years                                                                                               | 21 Years and above                                                                                                                                                                             | 21 Years to 70 Years                                                                                                                                                                                                                                                                                                                                                                                                                                                                                                           | Child, Adult, Older Adult                           |
| Phases                        | Phase 1                                                                             | Phase 1, Phase 2                                                                                                   | Not Applicable                                                                                                                                                                                 | Phase 2                                                                                                                                                                                                                                                                                                                                                                                                                                                                                                                        | Phase 1                                             |
| Enrollments                   | 100                                                                                 | 55                                                                                                                 | 98                                                                                                                                                                                             | 107                                                                                                                                                                                                                                                                                                                                                                                                                                                                                                                            | No data                                             |
| Study Type                    | Interventional                                                                      | Interventional                                                                                                     | Interventional                                                                                                                                                                                 | Interventional                                                                                                                                                                                                                                                                                                                                                                                                                                                                                                                 | Interventional                                      |
| Study Designs                 | Allocation: Randomized                                                              | Allocation: N/A, Intervention Model: Single Group                                                                  | Allocation: Randomized. Intervention Model: Parallel Assignment;                                                                                                                               | Allocation: Randomized; Intervention Model: Crossover Assignment; Masking: Double (Participant, Investigator);                                                                                                                                                                                                                                                                                                                                                                                                                 | Primary Purpose: Prevention                         |

|                    |                                                                                                       |                                                                                                       |                                                                                                                                     |                                                                                                       |                                                                                                       |
|--------------------|-------------------------------------------------------------------------------------------------------|-------------------------------------------------------------------------------------------------------|-------------------------------------------------------------------------------------------------------------------------------------|-------------------------------------------------------------------------------------------------------|-------------------------------------------------------------------------------------------------------|
|                    |                                                                                                       | Assignment, Masking:<br>None (Open Label),<br>Primary Purpose:<br>Prevention                          | Masking: Triple (Participant, Care<br>Provider, Investigator);<br>Primary Purpose: Prevention                                       | Primary Purpose: Prevention                                                                           |                                                                                                       |
| Completion<br>Date | April 5, 2023                                                                                         | 1/4/2014                                                                                              | 1/12/2015                                                                                                                           | 1/1/2013                                                                                              | No data                                                                                               |
| Locations          | Roswell Park Cancer<br>Institute, Buffalo, New<br>York, United States                                 | Georgetown Clinical<br>Research Unit,<br>Washington, District of<br>Columbia, United States           | OHSU Knight Cancer Institute,<br>Portland, Oregon, United States.<br>Portland VA Medical Center,<br>Portland, Oregon, United States | Masonic Cancer Center, University of Minnesota, Minneapolis,<br>Minnesota, United States              | No data                                                                                               |
| URL                | <a href="https://ClinicalTrials.gov/show/NCT04548193">https://ClinicalTrials.gov/show/NCT04548193</a> | <a href="https://ClinicalTrials.gov/show/NCT01790204">https://ClinicalTrials.gov/show/NCT01790204</a> | <a href="https://ClinicalTrials.gov/show/NCT01265953">https://ClinicalTrials.gov/show/NCT01265953</a>                               | <a href="https://ClinicalTrials.gov/show/NCT00691132">https://ClinicalTrials.gov/show/NCT00691132</a> | <a href="https://ClinicalTrials.gov/show/NCT00005883">https://ClinicalTrials.gov/show/NCT00005883</a> |

**Abbreviations:** BSE—Broccoli sprout extract; HDAC6—Histone Deacetylase 6; ITCs—Isothiocyanates; NCI—National Cancer Institute; NNK—4-(methylnitrosamino)-1-(3-pyridyl)-1-butanone; PEITC—Phenethyl Isothiocyanate; SFN—Safranal.
